# Supplementary material
Source: MDPI journal article supplement (https://www.mdpi.com/2312-7481/9/8/193)
Supplement: s1 [file s1]

# **Magneto transport and Enhanced Spin Polarised Photo Response in Solution-Processed Vertically Aligned Zn<sub>0.9</sub>Ni<sub>0.1</sub>O Nanowires**

Jamil Kazmi<sup>1,2†</sup>, Jamal Kazmi<sup>2†,\*</sup>, Syed Raza Ali Raza<sup>3\*</sup>, Babar Nazir<sup>1</sup>, Raja Azhar Saeed Khan<sup>1,4</sup>, Mohd Ambri Mohamed<sup>2</sup>, Mohsin Rafique<sup>5\*</sup>

<sup>1</sup> Department of Physics, The University of Azad Jammu and Kashmir, Muzaffarabad-13100, Azad Kashmir, Pakistan

<sup>2</sup> Institute of Microengineering and Nanoelectronics (IMEN), Universiti Kebangsaan Malaysia (UKM), 43600 Bangi, Selangor, Malaysia

<sup>3</sup> Department of Physics, Allama Iqbal Open University, Islamabad-44000, Pakistan

<sup>4</sup> Department of Physics, Women University of Azad Jammu & Kashmir, Bagh, 12500, Pakistan

<sup>5</sup> Beijing Academy of Quantum Information Sciences, Beijing, China

\*Corresponding Authors:

[jamal\\_physics@outlook.com](mailto:jamal_physics@outlook.com), [raza\\_physics@hotmail.com](mailto:raza_physics@hotmail.com), [mmohsin8389@gmail.com](mailto:mmohsin8389@gmail.com)

<sup>†</sup> These authors contributed equally to the manuscript

### Step: 1

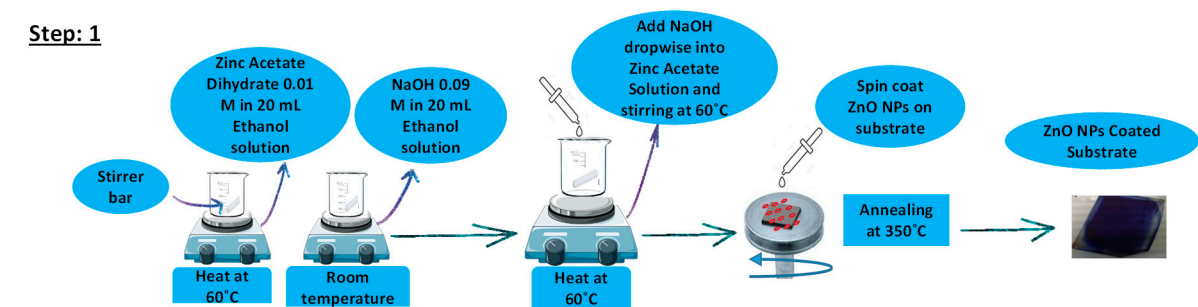

### Step: 2

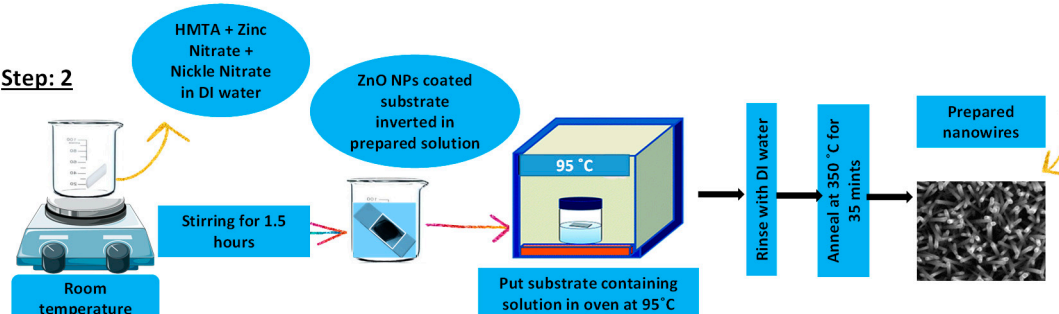

**Figure S1:** Stepwise schematic illustration of growth of ZnO nanoparticles and Ni-ZnO nanowires on glass substrate through chemical solution route.
